# Supplementary material for: Comparative transcriptome analysis of a lowly virulent strain of Erwinia amylovora in shoots of two apple cultivars – susceptible and resistant to fire blight
Source: BMC Genomics. 2017 Nov 13;18:868. doi: 10.1186/s12864-017-4251-z (PMC5683332; doi:10.1186/s12864-017-4251-z)
Supplement: Supplementary file 14 — Erwinia amylovora 650 genes differentially regulated in Free Redstar (FR-6d) and in Idared (I-6d) 6 days after inoculation (XLSX 12 kb) [file 12864_2017_4251_MOESM14_ESM.xlsx]

## Sheet: Arkusz1
Table S11. Erwinia amylovora 650 genes differentially regulated in Free Redstar (FR-6d) and in Idared (I-6d) 6 days after inoculation
Gene	Locus tag in CFBP143 Genome	Fold change*	FDR p-value correction	Product	Note	Function
EAMY_1948	EAMY_1948	-86.70	4.20E-02	hypothetical protein predicted by Glimmer/Critica
EAMY_1683	EAMY_1683	-5.33	4.20E-02	hypothetical protein predicted by Glimmer/Critica
EAMY_3440	EAMY_3440	-4.63	4.20E-02	hypothetical protein predicted by Glimmer/Critica
vanA	EAMY_3549	-2.93	4.20E-02	putative vanillate O-demethylase oxygenase subunit	vanillate O-demethylase oxygenase subunit, Rieske [2Fe-2S] region	Phenylpropionate dioxygenase and related ring-hydroxylating dioxygenases, large terminal subunit
EAMY_1750	EAMY_1750	-2.82	4.20E-02	putative flavoprotein monooxygenase	putative flavoprotein monooxygenase, Monooxygenase, FAD-binding	2-polyprenyl-6-methoxyphenol hydroxylase and related FAD-dependent oxidoreductases
pucI	EAMY_0845	-2.47	4.20E-02	putative NCS1-family allantoin permease	Permease for allantoin, ncs1: Nucleobase:Cation Symporter-1 (NCS1) family, TC 2.A.39.3.4 Allantoin permease	Cytosine/uracil/thiamine/allantoin permeases
dfoJ	EAMY_3238	2.59	4.20E-02	putative decarboxylase involved in desferrioxamine biosynthesis	Pyridoxal-dependent decarboxylase, involved in desferrioxamine biosynthesis, Pyridoxal phosphate-dependent transferase, major region	Glutamate decarboxylase and related PLP-dependent proteins
dfoC	EAMY_3240	2.66	4.20E-02	Desferrioxamine siderophore biosynthesis protein dfoC		Acetyltransferases, including N-acetylases of ribosomal proteins
dfoA	EAMY_3239	3.04	4.20E-02	L-lysine 6-monooxygenase involved in desferrioxamine biosynthesis	L-lysine 6-monooxygenase (Lysine 6-N-hydroxylase) (Lysine N(6)-hydroxylase) (Lysine-N-oxygenase), Desferrioxamine biosynthesis protein DfoA	Predicted flavoprotein involved in K+ transport
EAMY_1906	EAMY_1906	3.65	4.20E-02	hypothetical protein predicted by Glimmer/Critica
* Values below 0 mean that the gene has lower expression in Idared than in Free Redstar shoots 24h after inoculation; values over 0 mean that the gene has higher expression on Idared than in Free Redstar shoots 24h after inoculation.
